# Supplementary material
Source: PubMed Central journal article supplement (PMC4725476)
Supplement: pnas.1518079113.sapp.pdf [file pnas.1518079113.sapp.pdf]

## Supplemental experimental procedures

### *T. brucei* cell lines

427-derived bloodstream form *T. brucei* single marker-221 cells (1) were cultivated in HMI-9 with 10% fetal bovine serum at 37°C and 5% CO<sub>2</sub>. *T. brucei* transfection and drug selection were performed as described (2). *TbBBS-HA/-* and *TbBBS4-PTP/-* lines (used in experiments of Figures 1, 2 and 4) were created by ablating one endogenous allele and epitope tagging the other allele with the triple hemagglutinin (HA) tag and protein C-TEV-protein A (PTP) tag (3), respectively. The resulting fusion proteins have a C-terminus tag. PCR primers for tagging were: BBS1-HA-ORF-For: CGATACGGGCGCGAAGATGC; BBS1-HA-ORF-Rev: TGAATTGTCTTCTATGAATCCAGCGTCAG; BBS1-HA-UTR-For: AGGTGGACAACACTGATCGAACGT; BBS1-HA-UTR-Rev: TCGAGCTAGAGCTCCATACCCT; BBS4-HA-ORF-For: CGTCCGACTCTAGGGCAACCA; BBS4-HA-ORF-Rev: TTTGCGTAGCTTTGCCGTAAGGA; BBS4-HA-UTR-For: TGAACGTAGGTGACTGCAAGTACAG; BBS4-HA-UTR-Rev: GCCTTTCGTTGTTCCCTATCCCT; BBS4-PTP-ORF-For: GCACTCGCGCGCTATTAGTTTGC ; BBS4-PTP-ORF-Rev: TTGCGTAGCTTTGCCGTAAGGAG; BBS5-HA-ORF-For: ACGCGTAAAGGGCGTGAGCA; BBS5-HA-ORF-Rev: TGTCACGACATTCCACAAATCCTGCA; BBS5-HA-UTR-For: GTCGGGGGAAAGTGGAAGAGAG; BBS5-HA-UTR-Rev: ACACCTCGGTGGAATTTGATGTCGT; BBS7-HA-ORF-For: GCTGCGGGAACACATGTACG; BBS7-HA-ORF-Rev: ACAACGAAAAATACGCCGAAGCTC; BBS7-HA-UTR-For: GCTGGAGGTATGTGTGGCTGG; BBS7-HA-UTR-Rev: AGGGGTAAAACAAGGAGAGGAAGAGA. PCR-amplified fragments were cloned in pMOT-2H vector (4) with the exception of BBS4-PTP amplicon which was cloned into pC-Puro-PTP (3). *TbBBS -/-* lines were created by ablating both alleles using two different drug markers. PCR primers for genetic knockouts were: BBS1-KO-For-upstream: TCCGGAGAACACCATGTC ; BBS1-KO-Rev-upstream: ATAAAACGCTAATAATAACAATC; BBS1-KO-For-downstream: AGGTGGACAACACTGATCGAAC; BBS1-KO-Rev-downstream: AAAGTCTTTTGCCGCGTCGC; BBS4-KO-For-upstream: TTCCGCGATTTCTAGTTTCCTTCACGATATTCTGAAAATAC; BBS4-KO-Rev-upstream: ACCTATTGAGGGTTAGGGTTAGGGAAGTCCCAC; BBS4-KO-For-downstream: ATGGAGCCACTGGAAAAGCTACAGAGTGAAATCG; BBS4-KO-Rev-downstream: CGTCCACGCGCTTGTCTCCTCTAG; BBS5-KO-For-upstream: TCGGGGGAAACACGACACGA ; BBS5-KO-Rev-upstream: TGTTGTACACACAGGCCGGAAC ; BBS5-KO-For-downstream: GTCGGGGGAAAGTGGAAGAGAG; BBS5-KO-Rev-downstream: CCATTCCAGCTCTAAACCGCCA; BBS7-KO-For-upstream:

ATCAGGAGTAGTCCATGCCTTATCT; BBS7-KO-Rev-upstream:  
CCTCAGCTCACTCTCCCCTTC; BBS7-KO-For-downstream:  
GCTGGAGGTATGTGTGGCTGG; BBS7-KO-Rev-downstream:  
CACATGTCTGGGGTCACTCCTCT; BBS9-KO-For-upstream:  
AGATAGTGAGGTGAAAGAGGCTGAG; BBS9-KO-Rev-upstream:  
GGCTCGTGAAGCGCTATTATAACAG; BBS9-KO-For-downstream:  
GTATAAATGACGCTACCACCTGCGTTG; BBS9-KO-Rev-downstream:  
ATATATACACGTGGCGTGAAGCAACG. Amplified fragments representing flanking sequences of the targeted gene were cloned in pTub-Blast and pTub-Phleo vectors (gift of R. Sabatini) (5). *TbBBSx-HA/+ in TbBBSy-/-* lines (used in experiments of Figure 3) were created by epitope tagging one *TbBBS* allele with the HA tag in KO background of a different *TbBBS* gene; as control, one *TbBBS* allele was tagged with HA in WT background. *TbBBS1* add-back was created by introducing an ectopic copy of *TbBBS1* ORF in *TbBBS1 -/-*. *TbBBS1* ORF was amplified with BBS1-ORF-For: ATGCGTCTGGGAGCAGTTAG; BBS1-ORF-Rev: CTATGAATTGTCTTCTATGAATCCAGCGTC and cloned in the pHD496 vector (6).

### Western blotting

Cell lysates were run on standard SDS-PAGE gels and blotted on nitrocellulose membranes. For Blue Native electrophoresis (BN-PAGE) (7), cells were extracted with 20 mM Tris-HCl (pH=7.7), 150 mM KCl, 0.5% Igepal CA-630 (US Biological), 3 mM MgCl<sub>2</sub> and SIGMAFAST EDTA-free protease inhibitors (Sigma). Extracts were cleared by 18,000g centrifugation, ran on 4-16% Bis-Tris NativePAGE gels (Life Technologies), and blotted on 0.2µm PVDF membranes (Bio-Rad). Equal loading in BN-PAGE was confirmed by internal Coomassie staining or Western blot of VSG 221 from the same sample. Membranes were incubated with the following primary antibodies; mouse anti-HA (1:3,000, BioLegend clone 16B12); mouse anti-beta-Tubulin (1:5,000, DSHB); rabbit peroxidase-anti-peroxidase (PAP) for protein A detection (1:3,000, Sigma); mouse anti-protein C (1:2,000, Genscript clone HPC4); rabbit anti-VSG 221 (8) (1:100,000, gift of J. Bangs); rabbit anti-clathrin heavy chain (9) (1:5,000, gift of M. Field) and anti-ESAG7 (10) (1:5,000, gift of P. Borst). For detection, membranes were incubated with HRP-conjugated goat anti-mouse (1:5,000; Bio-Rad) and goat anti-rabbit (1:10,000; Bio-Rad). To allow detection the following cell equivalents were typically loaded: 5-10x10<sup>6</sup> for tagged BBS proteins, 1x10<sup>6</sup> for clathrin heavy chain, 2x10<sup>6</sup> for ESAG7, 5x10<sup>5</sup> for tubulin and 5x10<sup>5</sup> for VSG 221. Predicted sizes are: TbBBS1-HA= 69.2 kDa, TbBBS4-HA=55.4 kDa, TbBBS5-HA=44.5 kDa, TbBBS7-HA=86 kDa, TbBBS4-PTP=71 kDa.

### **Glycerol gradient centrifugation**

Linear 10-30% glycerol gradients were prepared in SW 41 centrifuge tubes using a Biocomp gradient maker (Biocomp Instruments, Inc.) by mixing equal volumes of 10% and 30% glycerol in 25 mM HEPES (pH 7.4), 60 mM KCl, 10 mM MgCl<sub>2</sub> and SIGMAFAST EDTA-free protease inhibitors (Sigma). Cells were harvested and washed twice in vPBS (137 mM NaCl, 3 mM KCl, 16 mM Na<sub>2</sub>HPO<sub>4</sub>, 3 mM KH<sub>2</sub>PO<sub>4</sub>, 46 mM sucrose, 10 mM glucose, pH 7.6) (11), then incubated for 10 min at room temperature in extraction buffer (100 mM PIPES, 2 mM EGTA, 1 mM MgSO<sub>4</sub>, 0.1 mM EDTA, pH 6.9) containing 0.5% Igepal CA-630 and SIGMAFAST protease inhibitors. Samples were pelleted at 14,000 rpm for 5 min. Supernatants were loaded onto glycerol gradients. HMW native marker (GE) standards were loaded onto an identical gradient. Gradients were centrifuged at 30,000 rpm for 20 hr at 4°C in a Beckman SW 41 rotor. 16 fractions were collected using a density gradient fractionator (Instrument Specialties Co). Samples were analyzed by SDS-PAGE, followed by Sypro Ruby staining of molecular weight standards or Western blotting for HA-tagged BBS proteins as described above.

### **Affinity purification and mass spectrometry analysis of TbBBS4-PTP associated protein complexes**

Single step and tandem immunoprecipitation of TbBBS4-PTP were performed as described (12). Cells were extracted in 50 mM Tris-HCl (pH=7.7), 150 mM KCl, 0.5% Igepal CA-630 (US Biological), 3 mM MgCl<sub>2</sub> and SIGMAFAST EDTA-free protease inhibitors (Sigma) on ice for 10 min. Cell extract was centrifuged at 25,000g, 4°C and incubated with Pierce control agarose resin (Life Technologies) for 1h at 4°C. Pre-cleared extract was then incubated with IgG sepharose (GE Healthcare) for 2h at 4°C and washed 3x with 20 mM Tris-HCl (pH=7.7), 150 mM KCl, 0.1% Tween-20 (Calbiochem), 3 mM MgCl<sub>2</sub>, SIGMAFAST EDTA-free protease inhibitors (Sigma) and 2x with 20 mM Tris-HCl (pH=7.7), 150 mM KCl, 0.1% Tween-20 (Calbiochem), 3 mM MgCl<sub>2</sub>, 1 mM Dithiothreitol (Sigma) and 0.5 mM Ethylenediaminetetraacetic acid (Promega). Elution was performed by adding 200 units ProTEV Plus protease (Promega) in 20 mM Tris-HCl (pH=7.7), 150 mM KCl, 0.1% Tween-20 (Calbiochem), 3 mM MgCl<sub>2</sub>, 1 mM Dithiothreitol (Sigma), 0.5 mM Ethylenediaminetetraacetic acid (Promega) and incubating overnight at 4°C. For one-step protein A purifications, the eluate was collected, concentrated with Amicon Ultra filters (10 kDa, Millipore) and boiled with SDS sample buffer. For tandem purifications (or one-step protein C purifications), the eluate (or pre-cleared cell extract) was collected and CaCl<sub>2</sub> was added to final concentration of 1 mM. Sample was then incubated with

anti-Protein C affinity matrix (Roche) for 2h at 4°C and washed 5x with 20 mM Tris-HCl (pH=7.7), 150 mM KCl, 0.1% Tween-20 (Calbiochem), 3 mM MgCl<sub>2</sub>, 0.5 mM Dithiothreitol (Sigma), 1 mM CaCl<sub>2</sub>. Elution was performed by adding 3x 5 mM Tris-Cl, pH 7.7, 5 mM Ethylenediaminetetraacetic acid (Promega), 10 mM Ethylene glycol tetraacetic acid (Bioworld), 0.1% Tween-20 (Calbiochem) and incubating at room temp for 10 min. Eluate was then concentrated with Amicon Ultra filters (10 kDa, Millipore) and boiled with SDS sample buffer. Tween-20 was omitted in final washes of samples destined for shotgun proteomics. These samples were precipitated with trichloroacetic acid (TCA, Sigma) and resuspended in digestion buffer (100 mM Tris-HCl, pH 8.5, 8M urea), reduced, alkylated and digested by sequential addition of lys-C and trypsin proteases (13, 14). The digested peptide mixture was desalted and fractionated online using a 75 µm inner diameter fritted fused silica capillary column with a 5 µm pulled electrospray tip and packed with 15 cm of Luna C18(2) 3 µM reversed phase particles in house. The gradient was delivered via an easy-nLC 1000 ultra high-pressure liquid chromatography (UHPLC) system (Thermo Scientific) (15, 16). MS/MS spectra were collected on a Q-Exactive mass spectrometer (Thermo Scientific). Data analysis was performed using the ProLuCID and DTASelect2 implemented in the Integrated Proteomics Pipeline - IP2 (Integrated Proteomics Applications, Inc., San Diego, CA) (17-19). Protein and peptide identifications were filtered using DTASelect and required at least two unique peptides per protein at a peptide-level false positive rate of 5% as estimated by a decoy database strategy (20). NSAF (Normalized spectral abundance factor) values were obtained as described (21).

### **Immunofluorescence microscopy**

Cells were washed once in PBS + 1% glucose (PBS-G) and fixed on ice for 10 min in PBS-G + 3% paraformaldehyde (Electron Microscopy Sciences) at a concentration of 1e7 cells/ml. Fixed cells were washed once in PBS and air-dried onto glass cover slips. After 15 min rehydration in PBS, cover slips were incubated for 10 min in PBS + 0.1% Triton X-100 (EMD Millipore) to permeabilize cells. Cover slips were washed 3 times with PBS and then blocked in PBS + 20% fetal bovine serum (Life Technologies), followed by incubation with the following primary antibodies diluted in blocking solution: mouse anti-HA (1:200, Covance), rabbit anti-PFR2 (1:1000) (22) . After 3 PBS washes, cover slips were incubated with donkey anti-mouse Alexa 488 (1:1500, Life Technologies) and donkey anti-rabbit Alexa 594 (1:1500, Life Technologies) secondary antibodies. Cover slips were washed 3 times with PBS and mounted in Vectashield antifade mounting medium with DAPI (Vector Labs). Images were acquired using a 100x objective and Axiovision HRc camera on a Zeiss Axioskop II compound microscope with

Axiovision software (Zeiss) and processed using Adobe Photoshop (Adobe Systems).

### **Immunoelectron microscopy**

Immunoelectron microscopy was performed as described (23). Parasites were fixed in 4% paraformaldehyde, 0.05% glutaraldehyde in 100 mM sodium cacodylate, pH 7.2 for 1 hr at 4°C. Samples were then embedded in 10% gelatin and infiltrated overnight with 2.3M sucrose, 20% polyvinyl pyrrolidone in PIPES/MgCl<sub>2</sub> at 4°C. Samples were trimmed, frozen in liquid nitrogen, and sectioned with a Leica Ultracut UCT7 cryo-ultramicrotome (Leica Microsystems Inc., Bannockburn, IL). 60 nm sections were blocked with 5% fetal bovine serum, 5% normal goat serum for 30 min and subsequently incubated with mouse anti-HA (BioLegend clone 16B12) followed by secondary antibody conjugated to 18nm colloidal gold (Jackson ImmunoResearch Laboratories, Inc., West Grove PA). Sections were washed in PIPES buffer followed by a water rinse, and stained with 0.3% uranyl acetate/2% methyl cellulose. Samples were viewed with a JEOL 1200EX transmission electron microscope (JEOL USA Inc., Peabody, MA) equipped with an AMT 8 megapixel digital camera (Advanced Microscopy Techniques, Woburn, MA). All labeling experiments were conducted in parallel with controls cells which did not express HA-tagged proteins. Localization to membranes and basal body was scored for gold particles that were observed on the mentioned structures.

### **Transmission electron microscopy**

Parasites were fixed in 3% paraformaldehyde, 3% glutaraldehyde, 1% tannic acid in 100 mM sodium cacodylate, pH 7.2 for 1 hr at room temperature. Fixed cells were washed in fixative without tannic acid and then rinsed and postfixed with 1% osmium tetroxide plus 1.5% potassium ferrocyanide. Dehydration through an acetone gradient was performed, followed by infiltration and embedment in Eponate 12 (Ted Pella, Co.). Sections were cut on a Reichert Ultracut E ultramicrotome, poststained with uranyl acetate and lead citrate, and imaged using a Hitachi H-7000 or a 20 Philips CM 120 transmission electron microscope.

### **Immunoprecipitation of human BBSome proteins**

Human Embryonic Kidney (HEK) 293 cells were reverse transfected with Lipofectamine 2000 (Life Technologies) for plasmids encoding Myc-tagged BBSome subunits. After 48hr, cells were harvested and lysed with 50 mM Tris (pH 7.4), 150 mM NaCl, 1% Triton X-100, and protease inhibitors. Lysates were clarified and incubated with mouse C-Myc monoclonal 9E10 for 1 hour. The antibody was then captured with Protein G Sepharose 4 fast flow beads (GE),

washed 20x with Wash buffer (25 mM Tris pH 7.4, 300 mM NaCl, 1% Triton X-100), and then boiled off beads in SDS sample buffer. Clathrin Heavy Chain (CHC) was detected by western with mouse clone 23 monoclonal (BD Biosciences, #610499).

### **Mouse infections**

All animal experiments strictly complied with the Institutional Animal Care and Use Committee of University of California, Los Angeles (Approved protocol permit: ARC # 2001-065). BALB/c female mice (The Jackson Laboratory, Bar Harbor, ME), 6 to 10 weeks old, were injected intraperitoneally with 1000 parasites in 0.2 ml cold phosphate buffered saline (pH 7.4). Parasitemia was monitored daily beginning 4 days post infection using an improved Neubauer hemocytometer.

### **Southern blotting**

Southern blotting was performed as described (22). Genomic DNA was isolated with a PureLink genomic DNA kit (Invitrogen), digested for 8 hours with restriction site enzymes (New England BioLabs) and ran on a 0.8% agarose gel. Gels were treated in depurination buffer (0.25 M HCl), denaturation buffer (0.5 M NaOH, 1.0 M NaCl), and neutralization buffer (1 M Tris-HCl [pH 7.5], 3 M NaCl) for 15 min each and then rinsed in distilled water. DNA was transferred to a Hybond-XL membrane (GE Healthcare) overnight in SSC buffer (3 M NaCl, 300 mM Na<sub>3</sub>C<sub>6</sub>H<sub>5</sub>O<sub>7</sub>) and cross-linked to the membrane by 1,500 J at a UV Stratalink cross linker (Stratagene).

Digoxigenin-labeled probes were PCR generated using primers: BlastProbe\_F: CCTCATTGAAAGAGCAACGG; BlastProbe\_R: CTCGAATTCTTAGCCCTCCC; PhleoProbe\_F: GCCATCACGAGATTTTCGATT; and PhleoProbe\_R: CACACTCATGAGATGCCTGC.

Hybridization, washes, and detection were performed using DIG EasyHyb buffer, CDP-Star substrate, and a PCR DIG-probe synthesis kit (Roche).

### **Sedimentation assay**

Cells were resuspended to  $3 \times 10^6$  cells/ml in fresh HMI-9 with 50% fetal bovine serum. Each culture was aliquoted into six samples (1 ml per cuvette) and incubated for 7.5 hours at 37°C and 5% CO<sub>2</sub>. The optical density at 600 nm (OD<sub>600</sub>) was measured every 2.5 hours. At each time point, three samples from each culture were left undisturbed to monitor sedimentation, while the other three samples were resuspended to monitor growth. The change in the OD<sub>600</sub> ( $\Delta$ OD<sub>600</sub>) was calculated by subtracting the OD<sub>600</sub> of resuspended samples from that of

undisturbed samples. Statistical analysis was performed with GraphPad Prism 5 (GraphPad Software).

### **Growth curve**

Cells were resuspended to  $1.5 \times 10^5$  cells/ml in fresh HMI-9 with 20% fetal bovine serum and incubated at 37°C and 5% CO<sub>2</sub>. Every 24 hours, cultures were counted (Coulter counter) and split to the same seeding density. Statistical analysis was performed with GraphPad Prism 5 (GraphPad Software).

### **VSG clearance assay**

VSG clearance was performed as described previously (24). Cells were washed with ice-cold 20% fetal bovine serum in HMI-9, resuspended at  $10^7$  cells/ml in ice-cold 50% fetal bovine serum in HMI-9 and kept on ice for 15 min. Rabbit anti-VSG 221 (gift of J. Bangs) was then added at 1:3000; to stain dead cells Propidium Iodide (PI, Life Technologies) was added at 1 µg/ml final concentration and cells were kept on ice for 10 min. An aliquot was then transferred to 1% Glucose in ice-cold Phosphate Buffer Saline (PBS-G) and used as 0 min sample. Cells were then transferred to 37°C for 5 min to allow endocytic anti-VSG clearance. Clearance was stopped by adding ice-cold PBS-G and cells were fixed with ice-cold 4% paraformaldehyde (PFA) in PBS on ice for 5 min. Fixative was washed out with ice-cold 1% BSA in PBS (PBS-B), cells were resuspended in ice-cold PBS-B with anti-rabbit Alexa Fluor 488 (1:3000, Life Technologies) and kept on ice for 10 min. Secondary antibody was washed out with ice-cold PBS-B and cells were resuspended in 10 µg/ml DAPI (4',6-diamidino-2-phenylindole, Sigma) in PBS-B and passed through a 40 µm filter (BD Biosciences) to ensure single-cell separation. Flow cytometry analysis was performed using LSR II (Becton Dickinson) and FlowJo software (Tree Star) to report mean Alexa Fluor 488 intensity of PI-negative/DAPI-positive cells at 5 min as percentage of 0 min clearance. Statistical analysis (one-way ANOVA with Dunnett post-test) was performed with GraphPad Prism 5 (GraphPad Software).

### **Uptake assays**

Uptake assays were performed as described previously (24, 25). Cells were washed with warm 1% Bovine Serum Albumin (BSA) in HMI-9, resuspended at  $10^7$  cells/ml in 1% BSA-HMI-9 and incubated at 37°C for 30 min. An aliquot was then transferred to 1% Glucose in ice-cold Phosphate Buffer Saline (PBS-G) and used as unstained control sample). Transferrin-Alexa Fluor 594 (Life Technologies) or Dextran-Alexa Fluor 594 (10,000 MW, Life Technologies) were

added to the remaining sample to final concentration of 50 µg/ml and 500 µg/ml respectively. Samples were incubated at 37°C for 15 min and uptake was stopped by adding ice-cold PBS-G. Cells were centrifuged, washed with ice-cold PBS-G and fixed with ice-cold 4% paraformaldehyde (PFA) in PBS on ice for 5 min. Fixative was washed out with ice-cold 1% BSA in PBS (PBS-B) and cells were resuspended in 10 µg/ml DAPI (4',6-diamidino-2-phenylindole, Sigma) in PBS-B and passed through a 40 µM filter (BD Biosciences) to ensure single-cell separation. Flow cytometry analysis was performed using LSR II (Becton Dickinson) and FlowJo software (Tree Star) to report mean Alexa Fluor 594 intensity of DAPI-positive cells at 15 min uptake. The transferrin binding assay was done in similar fashion but all steps were performed on ice to inhibit endocytosis. Statistical analysis (one-way ANOVA with Dunnett post-test) was performed with GraphPad Prism 5 (GraphPad Software).

### **SILAC proteomic analysis**

HMI-9 media was prepared as described (2), using IMDM lacking L-lysine and L-arginine (Caisson Labs) but supplemented with either normal L-lysine (Sigma) and L-arginine (Sigma) or stable heavy isotopes  $^{13}\text{C}_6$  L-lysine and  $^{13}\text{C}_6$  L-arginine (Cambridge Isotope Laboratories). 8% dialyzed heat-inactivated fetal bovine serum (Atlanta Biologicals) and 2% heat-inactivated fetal bovine serum (Life Technologies) were added. Wild-type (WT) and *BBS-KO* cells were washed in heavy or light media, respectively, and harvested after 3 days of growth in their respective medias (>9 generations for wild-type, >98%  $^{13}\text{C}_6$  incorporation). Each *BBS-KO* was mixed 1:1 with an equal number of WT cells. Surface proteins were biotinylated and purified from each *BBS-KO:WT* cell mixture following VSG depletion, as previously described (26). Proteomic analyses were performed essentially as described (27). On-bead samples were mixed with digestion buffer (100 mM Tris-HCl, pH 8.5, 8 M urea). The samples were reduced and alkylated by sequential treatment with 5 mM tris(2-carboxyethyl) phosphine (TCEP) and 10 mM iodoacetamide as described earlier (13, 14). Afterward, samples were sequentially digested with Lys-C and trypsin proteases as previously described (14). The digestion was stopped by addition of formic acid to 5% and peptide digests analyzed by LC-MS/MS on a ThermoFisher Q-Exactive. Peptide digests were desalted offline by C18 tip (Pierce) and separated online using reversed-phase chromatography on a 75 µM inner diameter fritted fused silica capillary column with a 5 µM pulled electrospray tip that was packed in-house with 15 cm of Luna C18(2) 3 µM reversed phase particles. An EASY-nLC 1000 ultra-high pressure liquid chromatography (UHPLC) system (Thermo Scientific) was used to deliver a linear acetonitrile gradient from 3% to 30% solvent B (Buffer A: 0.1% formic acid, Buffer B: Acetonitrile/ 0.1% formic acid) at a flow



rate of 200 nl/min. MS/MS spectra were collected on a Q-Exactive mass spectrometer (Thermo Scientific) as described (15, 16). Raw data files were converted to MS2 files using RawExtractor v.1.9.9.2 (Yates Lab, <http://fields.scripps.edu/downloads.php>). Data analysis was performed using ProLuCID for database searching, and DTASelect2 for probabilistic filtering as implemented in the Integrated Proteomics Pipeline v.2-IP2 (Integrated Proteomics Applications, Inc.) (17-19). MS/MS spectra were searched against a protein FASTA database obtained from TriTrypDB (downloaded from [tritypdb.org](http://tritypdb.org) on January 31, 2014) appended with sequences for ESAGs from the 221 VSG expression site (GI numbers 189094616–189094632) plus ESAG13 (28) and predicted short ORFs (29) and concatenated to a decoy database in which the amino acid sequence of each entry was reversed (23,172 total entries). The search parameters (13) were as follows: (1) precursor ion mass tolerance of +/-15 ppm, (2) fragment ion mass tolerance of +/-15 ppm, (3) only peptides with fully tryptic ends and unlimited missed cleavages were considered as candidates, and (4) a static modification of +57.02156 Da on cysteine residues resulting from carbamidomethylation. Protein and peptide identifications were filtered using DTASelect with mass accuracy statistics enabled (--mass) and required at least two unique peptides per protein and a spectra-level false positive rate of less than 1% as estimated by a reverse decoy database strategy (20). Intensity based quantitative interrogation of SILAC datasets was performed within the Skyline software package (30). Within Skyline, only uniquely mapping, fully tryptic peptides with no missed cleavages were considered for inquiry. Heavy-Light peak sets were annotated with q-values based on a target-decoy peak-picking approach provided by the mProphet algorithm, generating a randomly mass shifted decoy for each peptide (31). SILAC isotopic peak area ratios for the mProphet annotated peak boundaries were exported from Skyline and analyzed within R v3.2 (32). For subsequent analysis, we considered only proteins which were detected in wild type and all five TbBBS mutants by at least three peptides passing the mProphet q-value threshold of 0.01. Mutant/WT ratios were Log<sub>2</sub>-transformed to derive Log Fold Changes (LogFC). LogFC were then standardized to Z-scores to facilitate comparisons across mutants. Individual Z-scores are shown in heat maps with hierarchical clustering (Euclidean distance and Ward's linkage), while Z-scores averaged over TbBBS mutants are shown in dot plots.

### **Ubiquitin pulldown assay**

Cells were extracted in 50 mM Tris-HCl (pH=7.7), 150 mM KCl, 0.5% Igepal CA-630 (US Biological), 100  $\mu$ M N-ethylmaleimide (NEM) (Calbiochem), 3 mM MgCl<sub>2</sub> and SIGMAFAST EDTA-free protease inhibitors (Sigma) on ice for 10 min. Cell extract was centrifuged at

25,000g, 4°C and incubated with Pierce control agarose resin (Life Technologies) for 1h at 4°C. Pre-cleared extract was then split in two and each half was incubated with Pierce control agarose resin (Life Technologies) and ubiquitin resin (Boston Biochem) respectively for 2h at 4°C. Beads were washed 5x with 20 mM Tris-HCl (pH=7.7), 150 mM KCl, 0.1% Tween-20 (Calbiochem), 3 mM MgCl<sub>2</sub>, 100 μM NEM and SIGMAFAST EDTA-free protease inhibitors (Sigma) and then boiled in SDS sample buffer.

## Supplemental references

1. Wirtz E, Leal S, Ochatt C, & Cross GA (1999) A tightly regulated inducible expression system for conditional gene knock-outs and dominant-negative genetics in *Trypanosoma brucei*. *Mol Biochem Parasitol* 99(1):89-101.
2. Oberholzer M, Lopez MA, Ralston KS, & Hill KL (2009) Approaches for functional analysis of flagellar proteins in African trypanosomes. *Methods in Cell Biology* 93:21-57.
3. Schimanski B, Nguyen TN, & Gunzl A (2005) Highly efficient tandem affinity purification of trypanosome protein complexes based on a novel epitope combination. *Eukaryot Cell* 4(11):1942-1950.
4. Oberholzer M, Morand S, Kunz S, & Seebeck T (2006) A vector series for rapid PCR-mediated C-terminal in situ tagging of *Trypanosoma brucei* genes. *Mol Biochem Parasitol* 145(1):117-120.
5. Bullard W, Lopes da Rosa-Spiegler J, Liu S, Wang Y, & Sabatini R (2014) Identification of the glucosyltransferase that converts hydroxymethyluracil to base J in the trypanosomatid genome. *J Biol Chem* 289(29):20273-20282.
6. Biebinger S, *et al.* (1996) The PARP promoter of *Trypanosoma brucei* is developmentally regulated in a chromosomal context. *Nucleic Acids Res* 24(7):1202-1211.
7. Schagger H & von Jagow G (1991) Blue native electrophoresis for isolation of membrane protein complexes in enzymatically active form. *Anal Biochem* 199(2):223-231.
8. McDowell MA, Ransom DM, & Bangs JD (1998) Glycosylphosphatidylinositol-dependent secretory transport in *Trypanosoma brucei*. *Biochem J* 335(Pt 3):681-689.
9. Morgan GW, Allen CL, Jeffries TR, Hollinshead M, & Field MC (2001) Developmental and morphological regulation of clathrin-mediated endocytosis in *Trypanosoma brucei*. *J Cell Sci* 114(Pt 14):2605-2615.
10. Steverding D, *et al.* (1994) ESAG 6 and 7 products of *Trypanosoma brucei* form a transferrin binding protein complex. *European Journal of Cell Biology* 64(1):78-87.
11. Nolan DP, *et al.* (2000) Characterization of a novel alanine-rich protein located in surface microdomains in *Trypanosoma brucei*. *J Biol Chem* 275(6):4072-4080.
12. Gunzl A & Schimanski B (2009) Tandem affinity purification of proteins. *Curr Protoc Protein Sci* Chapter 19:Unit 19 19.

13. Kaiser P & Wohlschlegel J (2005) Identification of ubiquitination sites and determination of ubiquitin-chain architectures by mass spectrometry. *Methods Enzymol* 399:266-277.
14. Wohlschlegel JA (2009) Identification of SUMO-conjugated proteins and their SUMO attachment sites using proteomic mass spectrometry. *Methods Mol Biol* 497:33-49.
15. Kelstrup CD, Young C, Lavalley R, Nielsen ML, & Olsen JV (2012) Optimized fast and sensitive acquisition methods for shotgun proteomics on a quadrupole orbitrap mass spectrometer. *J Proteome Res* 11(6):3487-3497.
16. Michalski A, *et al.* (2011) Mass spectrometry-based proteomics using Q Exactive, a high-performance benchtop quadrupole Orbitrap mass spectrometer. *Mol Cell Proteomics* 10(9):M111 011015.
17. Cociorva D, D LT, & Yates JR (2007) Validation of tandem mass spectrometry database search results using DTASelect. *Curr Protoc Bioinformatics* Chapter 13:Unit 13 14.
18. Tabb DL, McDonald WH, & Yates JR, 3rd (2002) DTASelect and Contrast: tools for assembling and comparing protein identifications from shotgun proteomics. *J Proteome Res* 1(1):21-26.
19. Xu T, *et al.* (2015) ProLuCID: An improved SEQUEST-like algorithm with enhanced sensitivity and specificity. *J Proteomics*.
20. Elias JE & Gygi SP (2007) Target-decoy search strategy for increased confidence in large-scale protein identifications by mass spectrometry. *Nat Methods* 4(3):207-214.
21. Florens L, *et al.* (2006) Analyzing chromatin remodeling complexes using shotgun proteomics and normalized spectral abundance factors. *Methods* 40(4):303-311.
22. Saada EA, *et al.* (2014) Insect stage-specific receptor adenylate cyclases are localized to distinct subdomains of the Trypanosoma brucei Flagellar membrane. *Eukaryot Cell* 13(8):1064-1076.
23. Patel KK, *et al.* (2013) Autophagy proteins control goblet cell function by potentiating reactive oxygen species production. *Embo J* 32(24):3130-3144.
24. Engstler M, *et al.* (2004) Kinetics of endocytosis and recycling of the GPI-anchored variant surface glycoprotein in Trypanosoma brucei. *J Cell Sci* 117(Pt 7):1105-1115.
25. Natesan SK, Peacock L, Matthews K, Gibson W, & Field MC (2007) Activation of endocytosis as an adaptation to the mammalian host by trypanosomes. *Eukaryot Cell* 6(11):2029-2037.
26. Shimogawa MM, *et al.* (2015) Cell Surface Proteomics Provides Insight into Stage-Specific Remodeling of the Host-Parasite Interface in Trypanosoma brucei. *Mol Cell Proteomics* 14(7):1977-1988.

27. Oberholzer M, *et al.* (2011) Independent analysis of the flagellum surface and matrix proteomes provides insight into flagellum signaling in mammalian-infectious *Trypanosoma brucei*. *Mol Cell Proteomics* 10(10):M111 010538.
28. Nilsson D, *et al.* (2010) Spliced leader trapping reveals widespread alternative splicing patterns in the highly dynamic transcriptome of *Trypanosoma brucei*. *PLoS Pathog* 6(8):e1001037.
29. Ericson M, *et al.* (2014) On the extent and role of the small proteome in the parasitic eukaryote *Trypanosoma brucei*. *BMC Biol* 12:14.
30. MacLean B, *et al.* (2010) Skyline: an open source document editor for creating and analyzing targeted proteomics experiments. *Bioinformatics* 26(7):966-968.
31. Reiter L, *et al.* (2011) mProphet: automated data processing and statistical validation for large-scale SRM experiments. *Nat Methods* 8(5):430-435.
32. R Core Team (2013). R: A language and environment for statistical computing. R Foundation for Statistical Computing, Vienna, Austria. ISBN 3-900051-07-0, URL <http://www.R-project.org/>.

## Supplemental Figure legends

**Figure S1. The TbBBSome is dispensable *in vitro*.** (A) Southern blotting to confirm correct integration of drug resistance cassettes. Genomic DNA from each cell line was digested with three different restriction enzymes and probed with blasticidin and phleomycin resistance gene probes. Enzymes and expected sizes for blasticidin and phleomycin blots respectively are: 1) MfeI (none), 2) ApaLI (none), 3) MluI (none), 4) MfeI (6025, 6087 bp), 5) ApaLI (5203, 5265 bp), 6) SspI (6809, 6871 bp), 7) MfeI (6301, 6346 bp), 8) ApaLI (8481, 8526 bp), 9) AgeI (5023, 5068 bp), 10) AgeI (5796, 5858 bp), 11) ApaLI (3118, 3180 bp), 12) MluI (6877, 6939 bp), 13) MfeI (4589, 4651 bp), 14) SspI (7448, 7510 bp), 15) MluI (9358, 9420 bp). (B) Sedimentation assay for TbBBS mutants. All TbBBS-KOs sedimentation slope is similar to *wild type* (WT); ns, not significant. (C) Cumulative growth curve for TbBBS mutants. TbBBS9-KO growth slope is different than wild type (WT); \* $p < 0.05$ . (D) Transmission electron micrographs of flagellar cross-sections in wild type (WT) and TbBBS mutants.

**Figure S2. The TbBBSome is required for transferrin uptake.** (A) Western blot on lysates of *wild type* (WT) and *TbBBS* mutants. Tubulin (Tub) blot was used as loading control to compare levels of clathrin heavy chain (CHC) and expression site-associated gene 7 (ESAG7). (B) Transferrin binding in conditions that block endocytosis as % of wild type (WT). (C) Transferrin uptake as % of *TbBBS4* +/- (parental cell line used as control). In B-C, data are represented as mean  $\pm$  SEM; ns, not significant; \* $p < 0.05$  and \*\*\* $p < 0.001$  via one-way analysis of variance with Dunnett post test.

**Figure S3. Cell surface SILAC proteomics of TbBBS mutants.** All mutants were compared to wild type (WT). Proteins were compared via Z-scores of Log<sub>2</sub>-transformed Fold Change (Mutant/WT). (A) Distribution of Z-scores in TbBBS mutants. (B) Heat map of Z-scores in TbBBS mutants. The inset at the bottom shows the number of proteins within each bin of the heat map.

**Figure S4. Localization of TbBBS proteins.** Immunofluorescence for TbBBS-HA proteins; TbBBS-HA (green), PFR2 (red), DAPI (blue). Wild type (WT) is shown as negative control for anti-HA staining. Scale bar is 5  $\mu$ m.

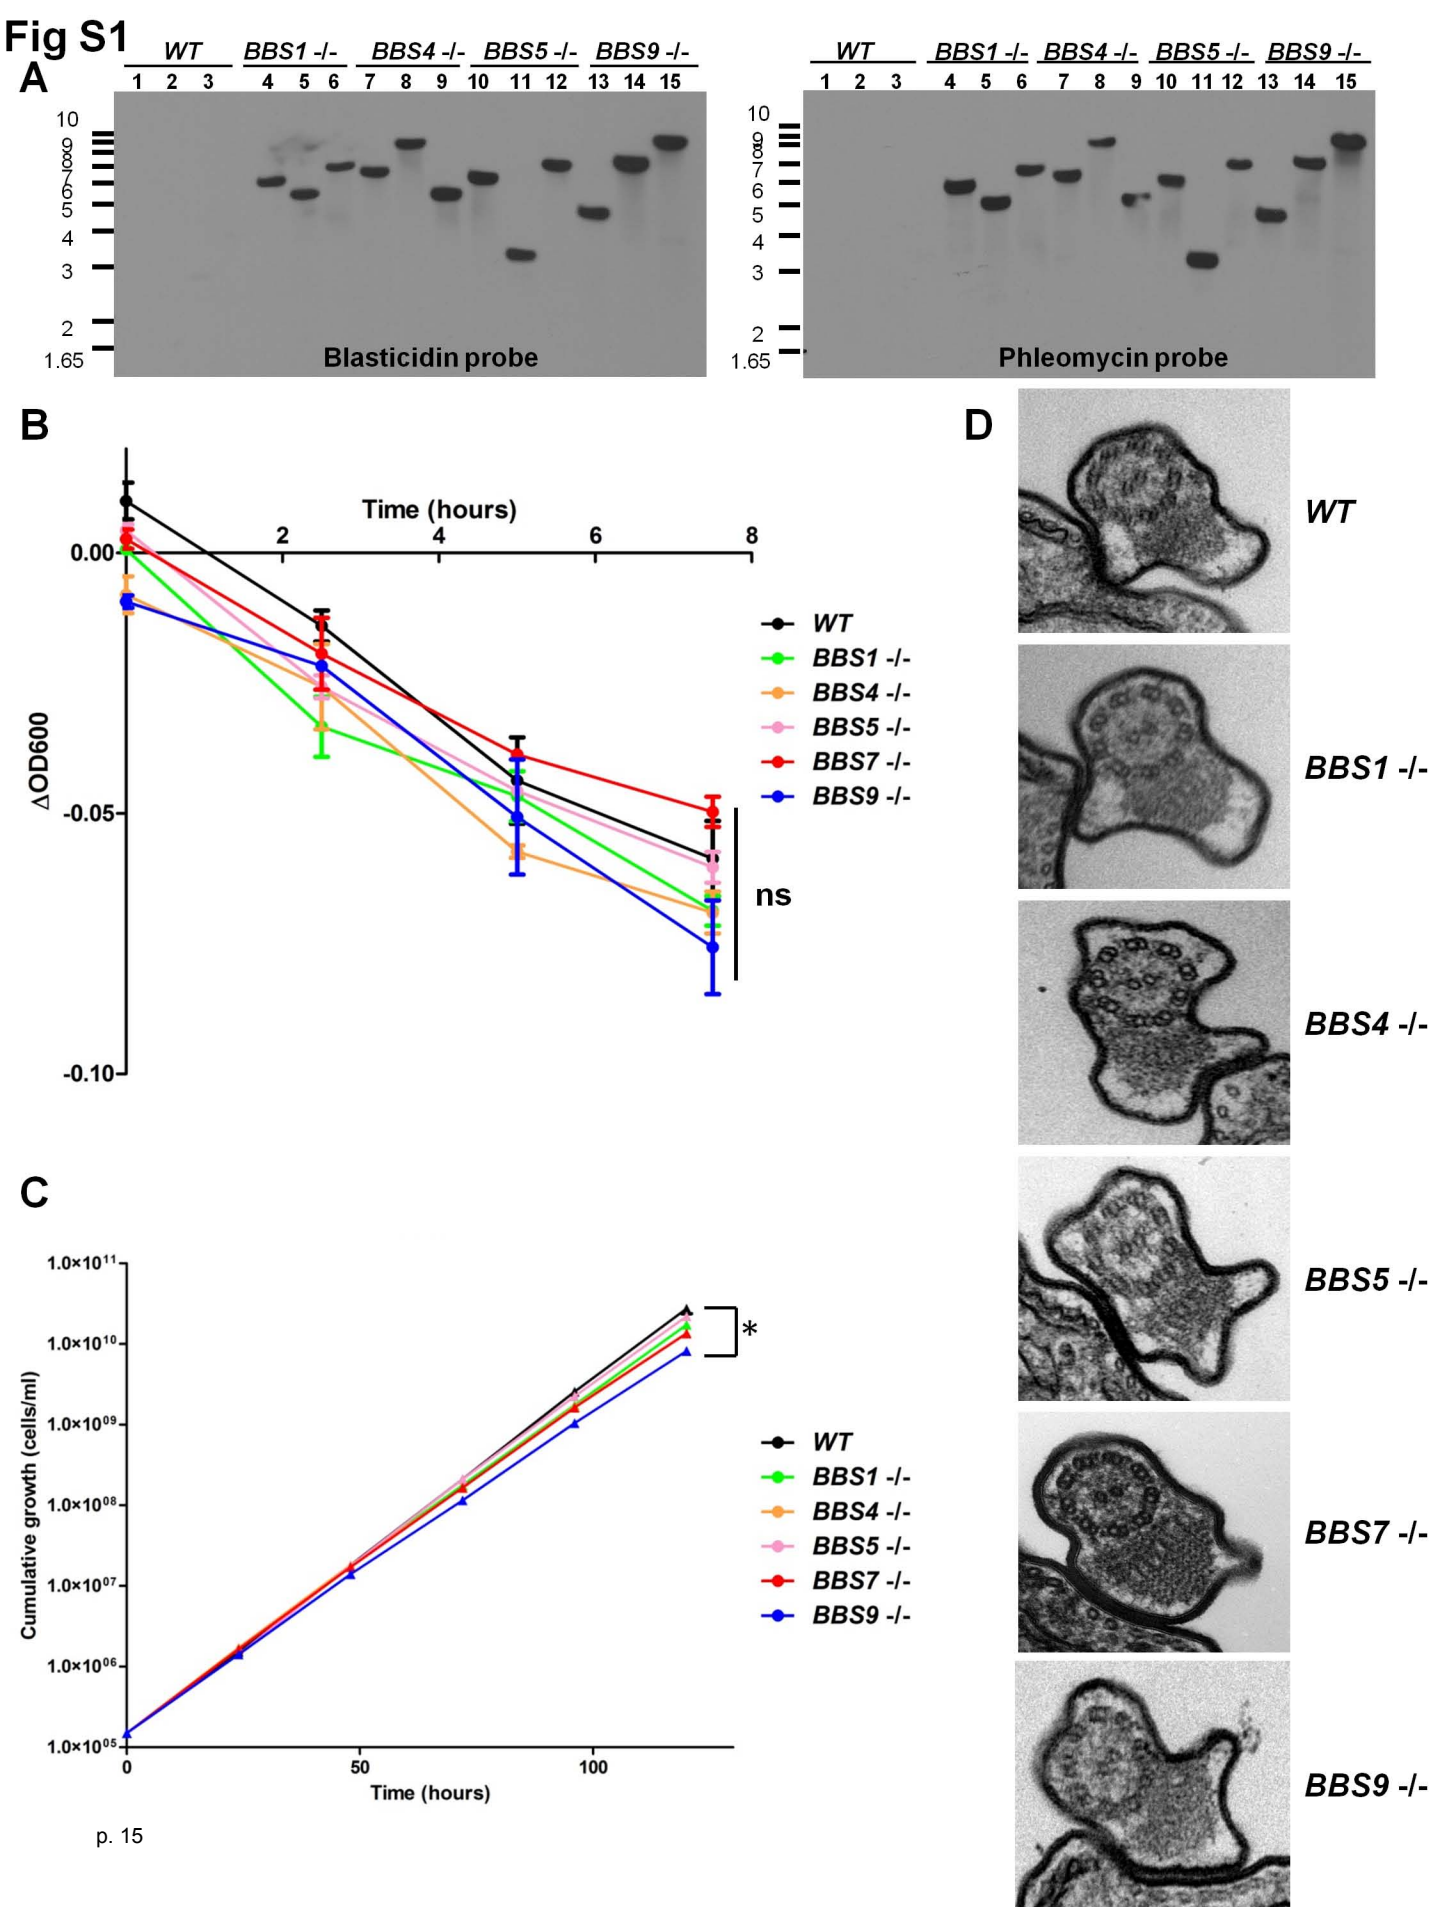

**Fig S2**

**A**

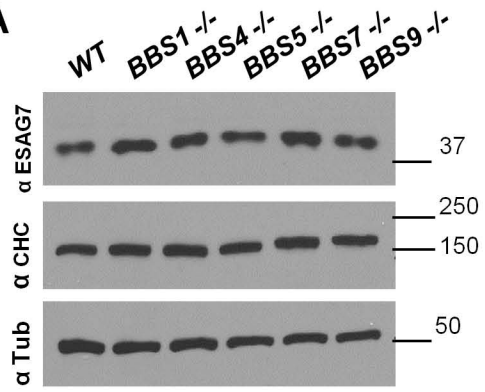

**B**

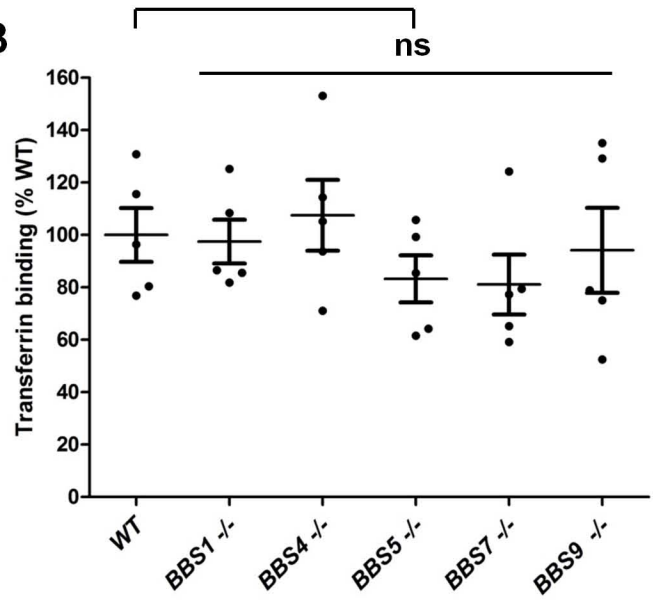

**C**

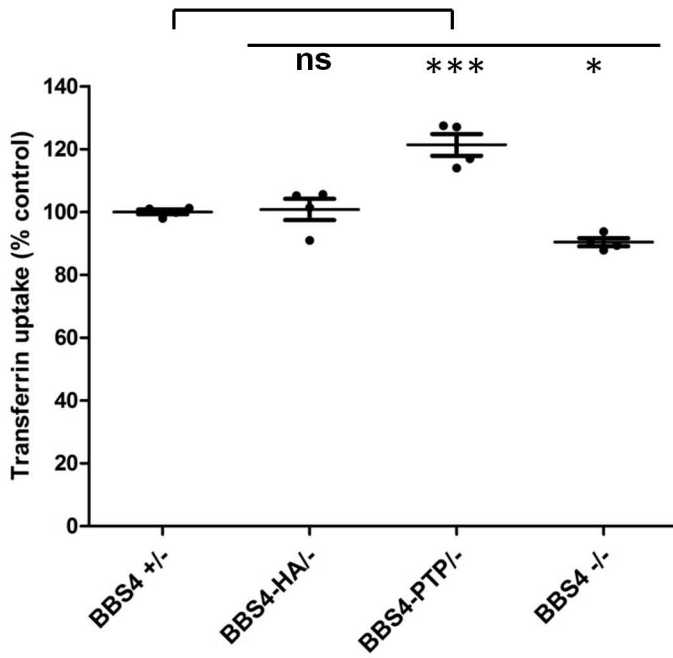



**Fig S3**

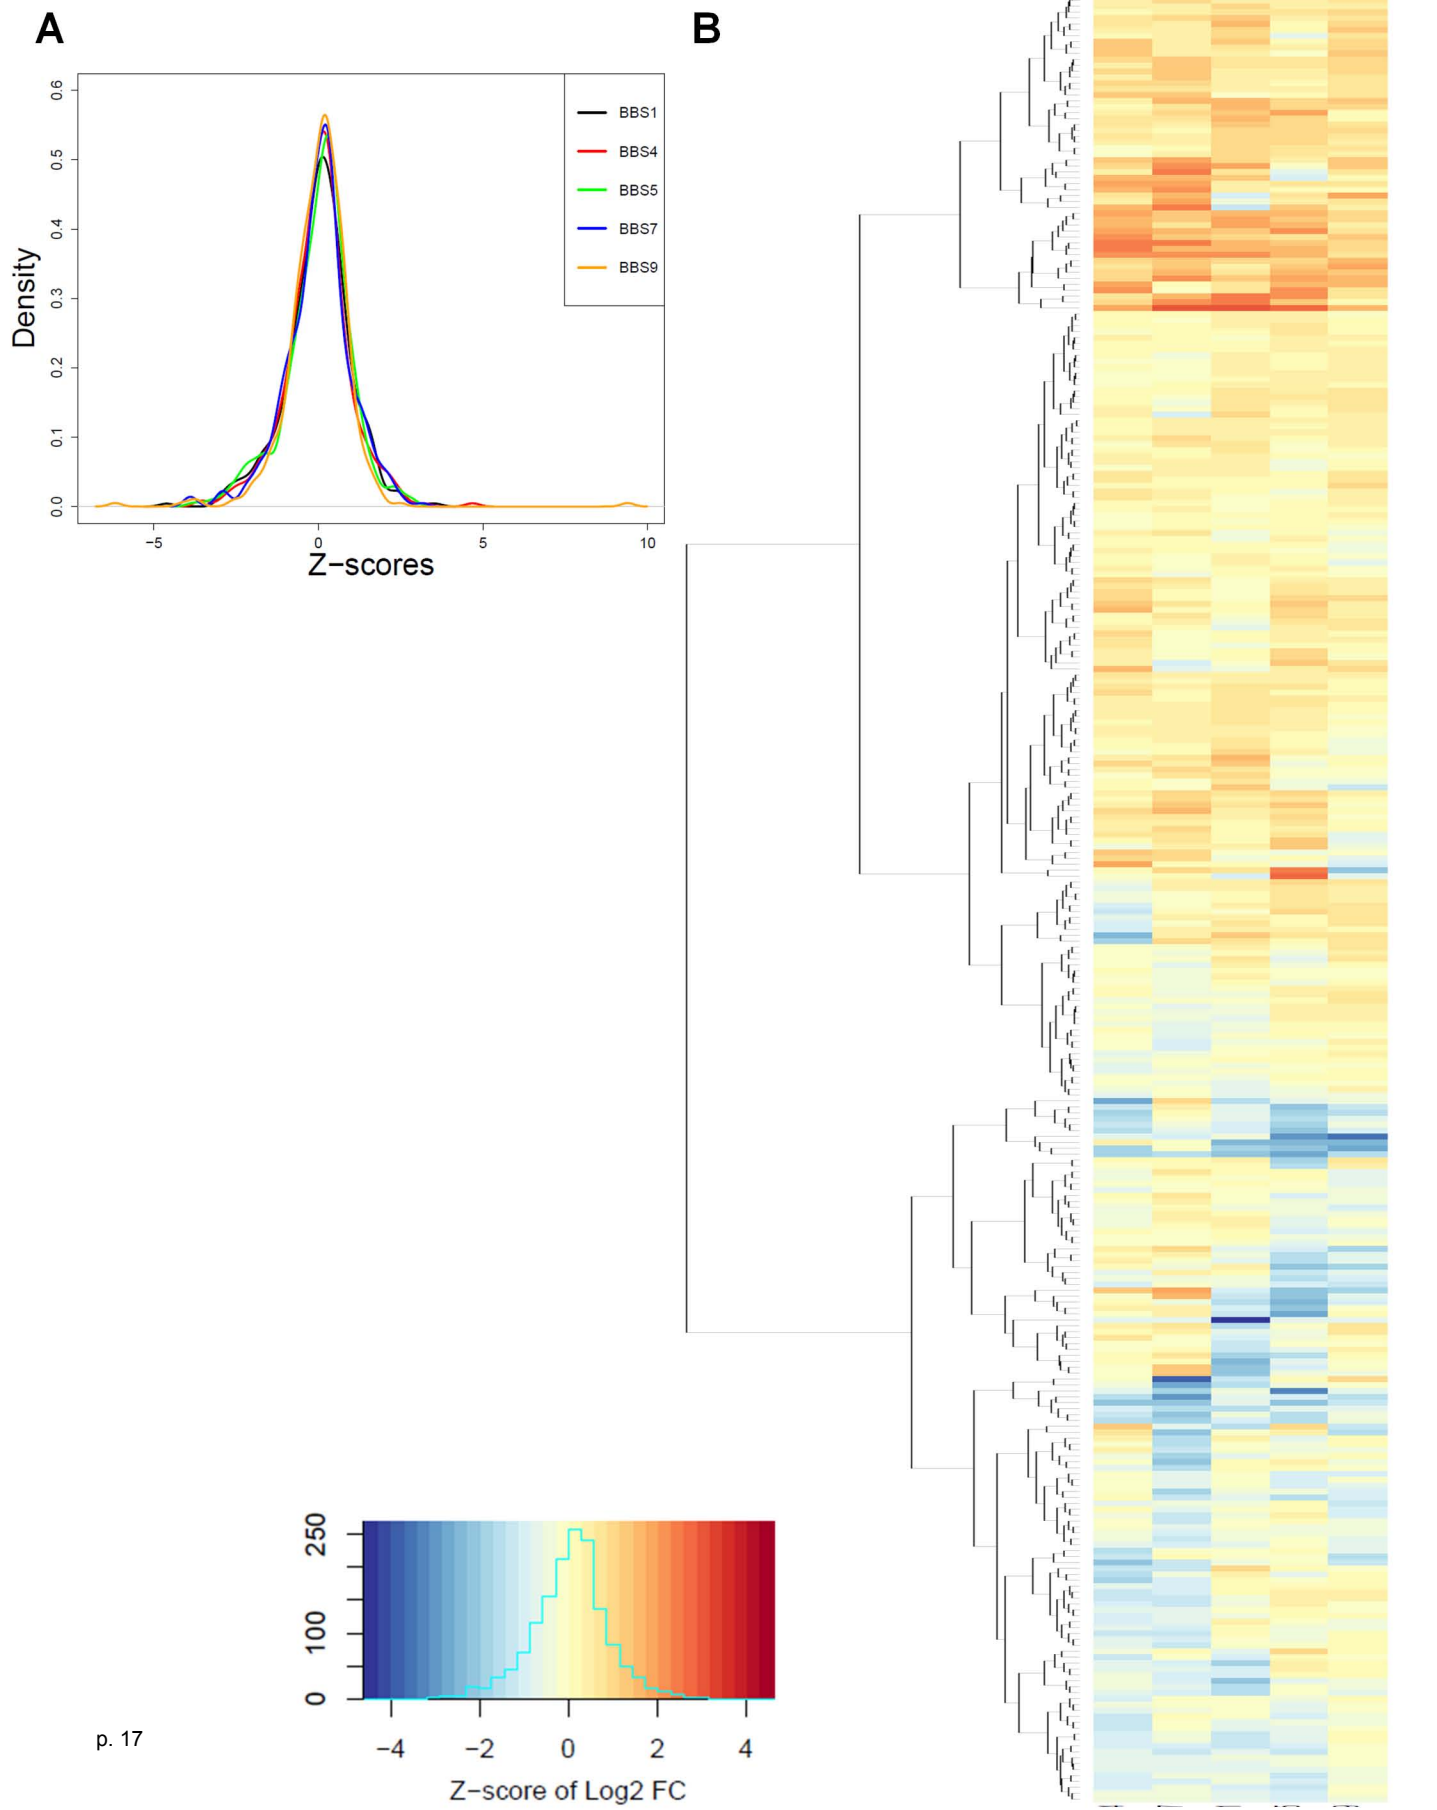

**Fig S4**

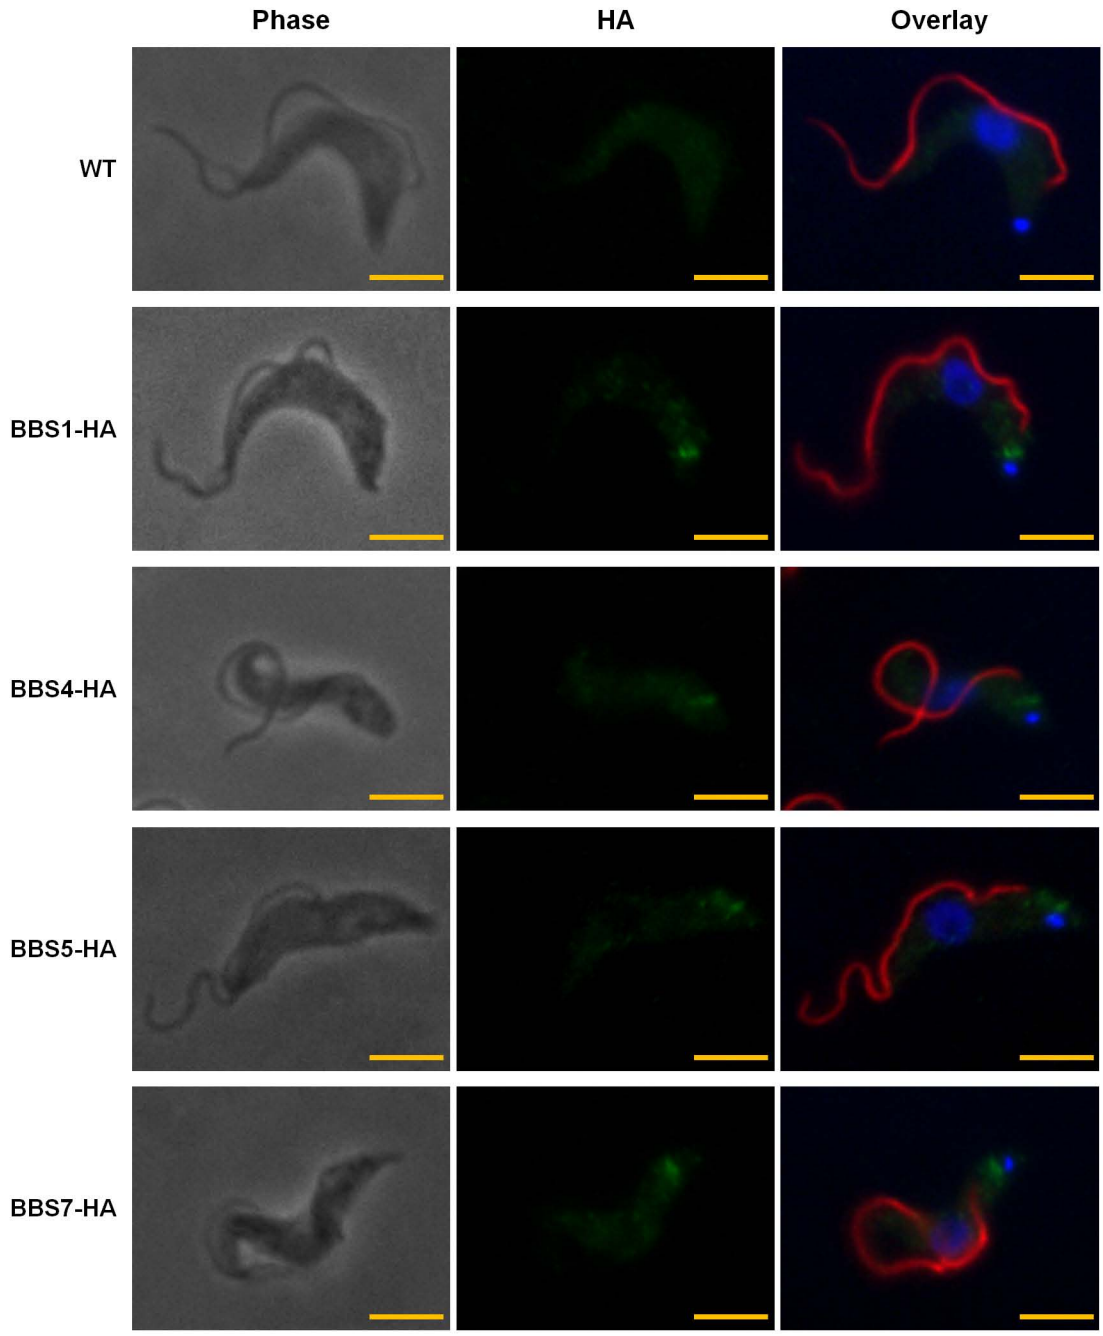

**Table S1. The top 10 proteins detected specifically in TbBBS4-PTP tandem purification by Normalized Spectral Abundance Factor (NSAF)**

| <b>NSAF (e<sup>5</sup>)</b> | <b>Spectra</b> | <b>Protein</b> | <b>Trityp ID</b>                                                 | <b>Predicted size (Da)</b>       |
|-----------------------------|----------------|----------------|------------------------------------------------------------------|----------------------------------|
| 7901                        | 97             | TbBBS5         | Tb927.1.4140                                                     | 41005                            |
| 7298                        | 203            | TbBBS9         | Tb927.11.14470                                                   | 92379                            |
| 7288                        | 113            | TbBBS4         | Tb927.10.6830                                                    | 51895                            |
| 6779                        | 166            | TbBBS2         | Tb927.6.2020                                                     | 80173                            |
| 6382                        | 118            | TbBBS8         | Tb927.11.12450.1<br>Tb927.11.12450.2                             | 59842<br>62629                   |
| 5483                        | 137            | TbBBS7         | Tb927.3.3640                                                     | 82529                            |
| 5165                        | 105            | TbBBS1         | Tb927.9.10670                                                    | 65643                            |
| 3757                        | 12             | TbBBS18        | Tb7.NT.49_2<br>[see (29)]                                        | 10949                            |
| 1043                        | 11             | TbMCP11        | Tb927.9.10310                                                    | 34296                            |
| 661                         | 4              | TbARF1         | Tb927.9.13650<br>Tb927.9.13740<br>Tb927.9.13710<br>Tb927.9.13680 | 20652<br>20624<br>20624<br>20624 |

**Table S2. Quantification of gold particles in immuno-electron micrographs**

| <b>Cell line</b> | <b>Micrographs</b> | <b>Total gold particles</b> | <b>Flagellar pocket membrane and vesicles (% of total)</b> | <b>Basal body (% of total)</b> |
|------------------|--------------------|-----------------------------|------------------------------------------------------------|--------------------------------|
| <i>WT</i>        | 37                 | 33                          | 3 (9.1%)                                                   | 1 (3%)                         |
| <i>TbBBS1-HA</i> | 21                 | 94                          | 53 (56.4%)                                                 | 24 (25.5%)                     |
| <i>TbBBS4-HA</i> | 21                 | 100                         | 42 (42%)                                                   | 7 (7%)                         |
| <i>TbBBS5-HA</i> | 29                 | 115                         | 57 (49.6%)                                                 | 1 (0.87%)                      |

**Table S3. The top 20 over-represented proteins in TbBBS mutants by cell surface SILAC proteomics Z-score**

| Protein ID     | Description                     | Z score  | Standard Deviation | Peptide number |
|----------------|---------------------------------|----------|--------------------|----------------|
| Tb927.7.180    | VSG-related                     | 2.50389  | 0.704726           | 9.4            |
| Tb927.11.13130 | MBAP1                           | 1.726392 | 0.687796           | 9.8            |
| CAQ57290.1     | ESAG2                           | 1.721865 | 0.660893           | 5.6            |
| Tb927.7.2160   | Hypothetical                    | 1.686534 | 0.541925           | 4.2            |
| Tb927.8.2070   | Hypothetical                    | 1.638948 | 0.410412           | 11.6           |
| Tb927.11.4100  | VSG-related                     | 1.574393 | 0.875002           | 6.6            |
| Tb927.11.12240 | Ubiquitin hydrolase             | 1.533892 | 0.51237            | 9.4            |
| Tb927.9.11480  | Hypothetical                    | 1.477354 | 0.305009           | 8.4            |
| Tb927.5.630    | ISG-related                     | 1.424376 | 0.316022           | 20.6           |
| Tb927.3.4720   | Dynamin                         | 1.418338 | 0.898791           | 15.2           |
| Tb927.11.7410  | MSP-A                           | 1.363737 | 0.480541           | 4.6            |
| Tb927.5.360    | ISG75                           | 1.268022 | 0.593007           | 28.4           |
| Tb927.11.5290  | MCP9                            | 1.258433 | 0.340361           | 8.6            |
| Tb927.5.1390   | ISG64                           | 1.188723 | 0.706698           | 14.2           |
| Tb927.11.7780  | ATOM46                          | 1.180361 | 0.515534           | 3.8            |
| Tb927.8.6730   | Hypothetical                    | 1.159344 | 0.837454           | 6.6            |
| Tb927.10.4770  | PI4P-5 kinase                   | 1.134434 | 0.230585           | 5.6            |
| Tb927.8.4060   | Flagellum adhesion glycoprotein | 1.134293 | 0.48578            | 4              |
| Tb927.6.1520   | Aquaglyceroporin 1              | 1.114121 | 0.797565           | 4              |
| Tb927.11.2430  | Cytoplasmic dynein HC           | 1.102358 | 1.052828           | 10.6           |

**Table S4. The top 20 under-represented proteins in TbBBS mutants by cell surface SILAC proteomics Z-score**

| <b>Protein ID</b> | <b>Description</b>                 | <b>Z score</b> | <b>Standard Deviation</b> | <b>Peptide number</b> |
|-------------------|------------------------------------|----------------|---------------------------|-----------------------|
| Tb927.10.14740    | Hypothetical                       | -2.02642       | 0.47777                   | 4.4                   |
| Tb927.5.1810      | Lysosomal/endosomal p67            | -1.78907       | 1.513292                  | 5.8                   |
| Tb927.10.6810     | Guanylate kinase                   | -1.75093       | 0.975107                  | 6.8                   |
| Tb927.11.10760    | Kinesin-like                       | -1.53084       | 0.911641                  | 7.2                   |
| Tb927.8.7100      | Acetyl coA carboxylase             | -1.50758       | 1.737859                  | 10.2                  |
| Tb11.v5.0208      | ISG-related                        | -1.49328       | 1.411813                  | 6.6                   |
| Tb927.10.15850    | PEX12                              | -1.40036       | 1.199963                  | 3.6                   |
| Tb927.5.1210      | Short chain dehydrogenase          | -1.31935       | 0.542058                  | 7.8                   |
| Tb927.4.5010      | Calreticulin                       | -1.26346       | 0.604535                  | 11                    |
| Tb927.5.890       | Oligosaccharyl transferase subunit | -1.1723        | 0.779902                  | 8                     |
| Tb927.2.3270      | ISG65                              | -1.13676       | 0.473674                  | 4.4                   |
| Tb927.11.6280     | Pyruvate phosphate dikinase        | -1.13587       | 0.846185                  | 5.4                   |
| Tb927.7.480       | Hypothetical                       | -1.12429       | 1.133975                  | 5.6                   |
| Tb927.9.8950      | Prenyl protease                    | -1.08662       | 0.640498                  | 8                     |
| Tb927.6.930       | Metacaspase 3                      | -1.08325       | 0.734215                  | 3.8                   |
| Tb927.11.1070     | Serine peptidase                   | -1.07245       | 1.020696                  | 5.8                   |
| Tb927.3.4230      | Hypothetical                       | -1.0577        | 0.96336                   | 5.2                   |
| Tb927.7.900       | Hypothetical                       | -0.97279       | 0.65166                   | 6                     |
| Tb927.7.2390      | Hypothetical                       | -0.90254       | 0.618136                  | 7.2                   |
| Tb927.7.1420      | Deoxyribose-phosphate aldolase     | -0.88926       | 0.55567                   | 6.8                   |

**Table S5. Proteins detected in TbBBS4-PTP tandem purification but absent in control one-step and tandem purifications from WT cells lacking the PTP tag.**

| Locus                                                    | Spectra | NSAF (x10 <sup>5</sup> ) | BBS protein | Description                                                                                                                                                                                                                                                                                                                                                                                                                                                                                                                                                                                                                                                                                                                                                        |
|----------------------------------------------------------|---------|--------------------------|-------------|--------------------------------------------------------------------------------------------------------------------------------------------------------------------------------------------------------------------------------------------------------------------------------------------------------------------------------------------------------------------------------------------------------------------------------------------------------------------------------------------------------------------------------------------------------------------------------------------------------------------------------------------------------------------------------------------------------------------------------------------------------------------|
| Tb927.1.4140; Tb11.v5.0758;                              | 97      | 7900.67                  | TbBBS5      | organism=Trypanosoma_brucei_TREU927   product=hypothetical protein, conserved   location=Tb927_11_bin_v5.1:3959461-3960570(-)   length=369   sequence_SO=random_sequence   SO=protein_coding ;                                                                                                                                                                                                                                                                                                                                                                                                                                                                                                                                                                     |
| Tb927.11.14470;                                          | 203     | 7298.08                  | TbBBS9      | organism=Trypanosoma_brucei_TREU927   product=hypothetical protein, conserved   location=Tb927_11_v5.1:3845532-3848042(+)   length=836   sequence_SO=chromosome   SO=protein_coding ;                                                                                                                                                                                                                                                                                                                                                                                                                                                                                                                                                                              |
| Tb927.10.6830; Tb11.v5.0539                              | 113     | 7288.05                  | TbBBS4      | organism=Trypanosoma_brucei_TREU927   product=hypothetical protein, conserved   location=Tb927_11_bin_v5.1:2352623-2354023(-)   length=466   sequence_SO=random_sequence   SO=protein_coding ;  organism=Trypanosoma_brucei_TREU927   product=Bardet-Biedl syndrome 4 protein homolog (BBS4-like protein 4), putative   location=Tb927_10_v5.1:1720306-1721706(+)   length=466   sequence_SO=chromosome   SO=protein_coding ;                                                                                                                                                                                                                                                                                                                                      |
| Tb927.6.2020;                                            | 166     | 6778.74                  | TbBBS2      | organism=Trypanosoma_brucei_TREU927   product=intergrin alpha chain protein, putative   location=Tb927_06_v5.1:656186-658396(-)   length=736   sequence_SO=chromosome   SO=protein_coding ;                                                                                                                                                                                                                                                                                                                                                                                                                                                                                                                                                                        |
| Tb927.11.12450.1;Tb927.11.12450.2;                       | 118     | 6381.58                  | TbBBS8      | organism=Trypanosoma_brucei_TREU927   product=unspecified product   location=Tb927_11_v5.1:3332809-3335153(+)   length=544   sequence_SO=chromosome   SO=protein_coding ;  organism=Trypanosoma_brucei_TREU927   product=unspecified product   location=Tb927_11_v5.1:3333447-3335153(+)   length=568   sequence_SO=chromosome   SO=protein_coding ;                                                                                                                                                                                                                                                                                                                                                                                                               |
| Tb927.3.3640;                                            | 137     | 5482.76                  | TbBBS7      | organism=Trypanosoma_brucei_TREU927   product=intergrin alpha chain protein, putative   location=Tb927_03_v5.1:1019968-1022621(+)   length=751   sequence_SO=chromosome   SO=protein_coding ;                                                                                                                                                                                                                                                                                                                                                                                                                                                                                                                                                                      |
| Tb927.9.10670;                                           | 105     | 5164.96                  | TbBBS1      | organism=Trypanosoma_brucei_TREU927   product=Bardet-Biedl syndrome 1 protein homolog (BBS1-like protein 1), putative   location=Tb927_09_v5.1:1688915-1690750(-)   length=611   sequence_SO=chromosome   SO=protein_coding ;                                                                                                                                                                                                                                                                                                                                                                                                                                                                                                                                      |
| Tb7.NT.49_2;                                             | 12      | 3756.89                  | TbBBS18     | no description;                                                                                                                                                                                                                                                                                                                                                                                                                                                                                                                                                                                                                                                                                                                                                    |
| Tb927.9.10310;                                           | 11      | 1042.92                  |             | organism=Trypanosoma_brucei_TREU927   product=mitochondrial carrier protein (MCP11)   location=Tb927_09_v5.1:1619646-1621538(-)   length=317   sequence_SO=chromosome   SO=protein_coding ;                                                                                                                                                                                                                                                                                                                                                                                                                                                                                                                                                                        |
| Tb927.9.13650;Tb927.9.13740;Tb927.9.13710;Tb927.9.13680; | 4       | 660.55                   |             | organism=Trypanosoma_brucei_TREU927   product=ADP-ribosylation factor, putative   location=Tb927_09_v5.1:2171988-2172536(-)   length=182   sequence_SO=chromosome   SO=protein_coding ;  organism=Trypanosoma_brucei_TREU927   product=ADP-ribosylation factor, putative   location=Tb927_09_v5.1:2174469-2175017(-)   length=182   sequence_SO=chromosome   SO=protein_coding ;  organism=Trypanosoma_brucei_TREU927   product=ADP-ribosylation factor, putative   location=Tb927_09_v5.1:2173645-2174193(-)   length=182   sequence_SO=chromosome   SO=protein_coding ;  organism=Trypanosoma_brucei_TREU927   product=ADP-ribosylation factor, putative   location=Tb927_09_v5.1:2172112-2172660(-)   length=182   sequence_SO=chromosome   SO=protein_coding ; |
| Tb927.9.5690;                                            | 2       | 531.95                   |             | organism=Trypanosoma_brucei_TREU927   product=60S acidic ribosomal protein, putative   location=Tb927_09_v5.1:976021-976362(+)   length=113   sequence_SO=chromosome   SO=protein_coding ;                                                                                                                                                                                                                                                                                                                                                                                                                                                                                                                                                                         |
| Tb927.10.12960;                                          | 4       | 522.70                   |             | organism=Trypanosoma_brucei_TREU927   product=ras-related protein rab-5,small GTPase, putative (RAB5A)   location=Tb927_10_v5.1:3150211-3150903(-)   length=230   sequence_SO=chromosome   SO=protein_coding ;                                                                                                                                                                                                                                                                                                                                                                                                                                                                                                                                                     |
| Tb927.5.2540;                                            | 6       | 439.83                   |             | organism=Trypanosoma_brucei_TREU927   product=hypothetical protein, conserved   location=Tb927_11_bin_v5.1:2616298-2617530(-)   length=410   sequence_SO=random_sequence   SO=protein_coding ;  organism=Trypanosoma_brucei_TREU927   product=hypothetical protein, conserved   location=Tb927_05_v5.1:878309-879541(+)   length=410   sequence_SO=chromosome   SO=protein_coding ;                                                                                                                                                                                                                                                                                                                                                                                |
| Tb927.8.890;                                             | 3       | 433.49                   |             | organism=Trypanosoma_brucei_TREU927   product=small GTP-binding protein Rab1, putative   location=Tb927_08_v5.1:265034-266020(-)   length=208   sequence_SO=chromosome   SO=protein_coding ;                                                                                                                                                                                                                                                                                                                                                                                                                                                                                                                                                                       |
| Tb927.3.3760;Tb927.3.3780;                               | 2       | 417.43                   |             | organism=Trypanosoma_brucei_TREU927   product=tryparedoxin (TRYP1)   location=Tb927_03_v5.1:1049840-1050898(+)   length=144   sequence_SO=chromosome   SO=protein_coding ;  organism=Trypanosoma_brucei_TREU927   product=tryparedoxin   location=Tb927_03_v5.1:1053583-1054017(+)   length=144   sequence_SO=chromosome   SO=protein_coding ;                                                                                                                                                                                                                                                                                                                                                                                                                     |
| Tb927.11.16800;                                          | 11      | 389.41                   |             | organism=Trypanosoma_brucei_TREU927   product=hypothetical protein, conserved   location=Tb927_11_v5.1:4470731-4473280(-)   length=849   sequence_SO=chromosome   SO=protein_coding ;                                                                                                                                                                                                                                                                                                                                                                                                                                                                                                                                                                              |

**Table S5. Proteins detected in TbBBS4-PTP tandem purification but absent in control one-step and tandem purifications from WT cells lacking the PTP tag.**

| Locus                                                                                                                    | Spectra | NSAF (x10 <sup>5</sup> ) | BBS protein | Description                                                                                                                                                                                                                                                                                                                                                                                                                                                                                                                                                                               |
|--------------------------------------------------------------------------------------------------------------------------|---------|--------------------------|-------------|-------------------------------------------------------------------------------------------------------------------------------------------------------------------------------------------------------------------------------------------------------------------------------------------------------------------------------------------------------------------------------------------------------------------------------------------------------------------------------------------------------------------------------------------------------------------------------------------|
| Tb927.10.14800;                                                                                                          | 5       | 388.31                   |             | organism=Trypanosoma_brucei_TREU927   product=protein kinase, putative   location=Tb927_11_bin_v5.1:3017415-3018578(+)  length=387   sequence_SO=random_sequence   SO=protein_coding ;  organism=Trypanosoma_brucei_TREU927   product=protein kinase, putative,mitogen-activated protein kinase 9, putative   location=Tb927_10_v5.1:3608595-3609758(-)   length=387   sequence_SO=chromosome   SO=protein_coding ;                                                                                                                                                                       |
| Tb927.2.5980;                                                                                                            | 11      | 380.01                   |             | organism=Trypanosoma_brucei_TREU927   product=ATP-dependent Clp protease subunit, heat shock protein 104 (HSP104), putative,atp-dependent chaperone (HSP104)   location=Tb927_02_v5.1:1084458-1087070(+)  length=870   sequence_SO=chromosome   SO=protein_coding ;                                                                                                                                                                                                                                                                                                                       |
| Tb927.11.9300;                                                                                                           | 7       | 375.69                   |             | organism=Trypanosoma_brucei_TREU927   product=hypothetical protein, conserved                                                                                                                                                                                                                                                                                                                                                                                                                                                                                                             |
| Tb927.8.6110;                                                                                                            | 6       | 361.38                   |             | organism=Trypanosoma_brucei_TREU927   product=hypothetical protein, conserved   location=Tb927_08_v5.1:1785314-1786813(+)  length=499   sequence_SO=chromosome   SO=protein_coding ;                                                                                                                                                                                                                                                                                                                                                                                                      |
| Tb927.11.690;                                                                                                            | 7       | 296.32                   |             | organism=Trypanosoma_brucei_TREU927   product=hypothetical protein,chrXI additional, unordered contigs   location=tryp_XI-147f01.q1ca:7725-9797(+)  length=690   sequence_SO=contig   SO=protein_coding ;  organism=Trypanosoma_brucei_TREU927   product=hypothetical protein, conserved   location=Tb927_11_v5.1:166308-168440(-)  length=710   sequence_SO=chromosome   SO=protein_coding ;                                                                                                                                                                                             |
| Tb927.7.4180;                                                                                                            | 3       | 295.62                   |             | organism=Trypanosoma_brucei_TREU927   product=fatty acid elongase, putative   location=Tb927_07_v5.1:1114698-1115615(+)  length=305   sequence_SO=chromosome   SO=protein_coding ;                                                                                                                                                                                                                                                                                                                                                                                                        |
| Tb927.11.13230;                                                                                                          | 2       | 278.29                   |             | organism=Trypanosoma_brucei_TREU927   product=hypothetical protein, conserved   location=Tb927_11_v5.1:3548093-3548743(-)  length=216   sequence_SO=chromosome   SO=protein_coding ;                                                                                                                                                                                                                                                                                                                                                                                                      |
| Tb927.5.3810;                                                                                                            | 4       | 262.49                   |             | organism=Trypanosoma_brucei_TREU927   product=orotidine-5-phosphate decarboxylase/orotate phosphoribosyltransferase, putative,OMPDCase-OPRTase, putative   location=Tb927_05_v5.1:1246263-1247652(+)  length=458   sequence_SO=chromosome   SO=protein_coding ;                                                                                                                                                                                                                                                                                                                           |
| Tb927.1.120;                                                                                                             | 7       | 245.78                   |             | organism=Trypanosoma_brucei_TREU927   product=retrotransposon hot spot protein 4 (RHS4), putative   location=Tb927_01_v5.1:60266-62836(-)  length=856   sequence_SO=chromosome   SO=protein_coding ;                                                                                                                                                                                                                                                                                                                                                                                      |
| Tb927.7.710;                                                                                                             | 5       | 235.17                   |             | organism=Trypanosoma_brucei_TREU927   product=heat shock 70 kDa protein, putative (HSP70)   location=Tb927_07_v5.1:155358-157286(-)  length=639   sequence_SO=chromosome   SO=protein_coding ;                                                                                                                                                                                                                                                                                                                                                                                            |
| Tb927.2.2970;                                                                                                            | 2       | 192.66                   |             | organism=Trypanosoma_brucei_TREU927   product=mitochondrial carrier protein (MCP13)   location=Tb927_02_v5.1:564310-565248(+)  length=312   sequence_SO=chromosome   SO=protein_coding ;                                                                                                                                                                                                                                                                                                                                                                                                  |
| Tb11.01.1680.v5;Tb927.11.9920; Tb11.v5.0537;Tb11.NT.155_1;Tb 11.NT.154_1;                                                | 10      | 192.57 (1054.77)*        |             | organism=Trypanosoma_brucei_TREU927   product=polyubiquitin, putative   location=Tb927_11_bin_v5.1:1116876-1120727(+)  length=1283   sequence_SO=random_sequence   SO=protein_coding ;  organism=Trypanosoma_brucei_TREU927   product=polyubiquitin, putative   location=Tb927_11_v5.1:2675201-2677258(+)  length=685   sequence_SO=chromosome   SO=protein_coding ;  organism=Trypanosoma_brucei_TREU927   product=polyubiquitin, putative   location=Tb927_11_bin_v5.1:2333410-2335281(+)  length=623   sequence_SO=random_sequence   SO=protein_coding ;no description;no description; |
| CAQ57292.1;                                                                                                              | 2       | 182.71                   |             | expression site-associated gene 1 (ESAG1) protein Tb427.BES40.20 [Trypanosoma brucei brucei] ;                                                                                                                                                                                                                                                                                                                                                                                                                                                                                            |
| Tb927.9.10770;                                                                                                           | 3       | 162.46                   |             | organism=Trypanosoma_brucei_TREU927   product=Polyadenylate-binding protein 2 (Poly(A)-binding protein 2) (Poly(A)-binding protein II) (PABII) (Polyadenylate-binding nuclear protein 1) (Nuclear poly(A)-binding protein 1) (PABP2), putative (PABP2)   location=Tb927_09_v5.1:1699911-1701578(-)  length=555   sequence_SO=chromosome   SO=protein_coding ;                                                                                                                                                                                                                             |
| Tb927.6.4840;Tb927.6.4920;Tb9 27.6.4910;Tb927.6.4900;Tb927.6 .4890;Tb927.6.4880;Tb927.6.487 0;Tb927.6.4860;Tb927.6.4850; | 2       | 151.41                   |             | organism=Trypanosoma_brucei_TREU927   product=S-adenosylmethionine synthetase, putative (METK1)                                                                                                                                                                                                                                                                                                                                                                                                                                                                                           |
| Tb927.5.3400;                                                                                                            | 5       | 148.64                   |             | organism=Trypanosoma_brucei_TREU927   product=calcium-translocating P-type ATPase,calcium pump   location=Tb927_05_v5.1:1131431-1134466(-)  length=1011   sequence_SO=chromosome   SO=protein_coding ;                                                                                                                                                                                                                                                                                                                                                                                    |



**Table S5. Proteins detected in TbBBS4-PTP tandem purification but absent in control one-step and tandem purifications from WT cells lacking the PTP tag.**

| Locus                                | Spectra | NSAF (x10 <sup>5</sup> ) | BBS protein | Description                                                                                                                                                                                                                                                                                                                                                                                                                                                                                                                                                                                                                   |
|--------------------------------------|---------|--------------------------|-------------|-------------------------------------------------------------------------------------------------------------------------------------------------------------------------------------------------------------------------------------------------------------------------------------------------------------------------------------------------------------------------------------------------------------------------------------------------------------------------------------------------------------------------------------------------------------------------------------------------------------------------------|
| Tb927.11.4210;                       | 3       | 143.12                   |             | organism=Trypanosoma_brucei_TREU927   product=hypothetical protein, conserved   location=Tb927_11_v5.1:1233113-1235005(-)   length=630   sequence_SO=chromosome   SO=protein_coding ;                                                                                                                                                                                                                                                                                                                                                                                                                                         |
| Tb927.8.4890;                        | 2       | 136.00                   |             | organism=Trypanosoma_brucei_TREU927   product=endoplasmic reticulum oxidoreductin, putative,pol-associated gene 1   location=Tb927_08_v5.1:1441680-1443008(-)   length=442   sequence_SO=chromosome   SO=protein_coding ;                                                                                                                                                                                                                                                                                                                                                                                                     |
| Tb11.v5.0713;                        | 3       | 131.05                   |             | organism=Trypanosoma_brucei_TREU927   product=retrotransposon hot spot (RHS) protein, putative   location=Tb927_11_bin_v5.1:3629729-3631795(+)   length=688   sequence_SO=random_sequence   SO=protein_coding ;                                                                                                                                                                                                                                                                                                                                                                                                               |
| Tb927.2.5080;                        | 2       | 128.17                   |             | organism=Trypanosoma_brucei_TREU927   product=hypothetical protein, conserved   location=Tb927_02_v5.1:897372-898781(-)   length=469   sequence_SO=chromosome   SO=protein_coding ;                                                                                                                                                                                                                                                                                                                                                                                                                                           |
| Tb927.4.4820;                        | 2       | 122.67                   |             | organism=Trypanosoma_brucei_TREU927   product=amino acid transporter 8, putative   location=Tb927_11_bin_v5.1:2354708-2356180(-)   length=490   sequence_SO=random_sequence   SO=protein_coding ; <br>  organism=Trypanosoma_brucei_TREU927   product=amino acid transporter 10, putative (AATP10)   location=Tb927_04_v5.1:1317708-1319180(-)   length=490   sequence_SO=chromosome   SO=protein_coding ;                                                                                                                                                                                                                    |
| Tb927.3.1380;                        | 2       | 115.82                   |             | organism=Trypanosoma_brucei_TREU927   product=ATP synthase beta chain, mitochondrial precursor,ATP synthase F1, beta subunit                                                                                                                                                                                                                                                                                                                                                                                                                                                                                                  |
| Tb927.6.2640;                        | 2       | 112.78                   |             | organism=Trypanosoma_brucei_TREU927   product=importin alpha subunit, putative (TbKap60)   location=Tb927_06_v5.1:793568-795169(+)   length=533   sequence_SO=chromosome   SO=protein_coding ;                                                                                                                                                                                                                                                                                                                                                                                                                                |
| Tb927.2.3030;                        | 2       | 74.03                    |             | organism=Trypanosoma_brucei_TREU927   product=ATP-dependent Clp protease subunit, heat shock protein 78 (HSP78), putative   location=Tb927_02_v5.1:575019-577457(+)   length=812   sequence_SO=chromosome   SO=protein_coding ;                                                                                                                                                                                                                                                                                                                                                                                               |
| Tb927.1.180;Tb927.2.370;Tb927.1.220; | 2       | 72.13                    |             | organism=Trypanosoma_brucei_TREU927   product=retrotransposon hot spot protein 1 (RHS1), putative   location=Tb927_01_v5.1:69904-72405(-)   length=833   sequence_SO=chromosome   SO=protein_coding ; <br>  organism=Trypanosoma_brucei_TREU927   product=retrotransposon hot spot protein 1 (RHS1), putative   location=Tb927_02_v5.1:55836-58340(-)   length=834   sequence_SO=chromosome   SO=protein_coding ; <br>  organism=Trypanosoma_brucei_TREU927   product=retrotransposon hot spot protein 1 (RHS1), putative   location=Tb927_01_v5.1:85854-88355(-)   length=833   sequence_SO=chromosome   SO=protein_coding ; |
| Tb927.11.9150;                       | 3       | 52.18                    |             | organism=Trypanosoma_brucei_TREU927   product=hypothetical protein, conserved   location=Tb927_11_v5.1:2505165-2510351(+)   length=1728   sequence_SO=chromosome   SO=protein_coding ;                                                                                                                                                                                                                                                                                                                                                                                                                                        |
| Tb927.8.1590;                        | 2       | 13.97                    |             | organism=Trypanosoma_brucei_TREU927   product=ubiquitin-protein ligase, putative (upl3)   location=Tb927_08_v5.1:516817-529731(+)   length=4304   sequence_SO=chromosome   SO=protein_coding ;                                                                                                                                                                                                                                                                                                                                                                                                                                |

(if small ORFs Tb11.NT.155\_1 and Tb11.NT.154\_1 [reference 118] are included in NSAF calculation)\*
